# Supplementary material
Source: ML conference proceedings conference paper supplement (https://openaccess.thecvf.com/content/WACV2022/html/Zheltonozhskii_Contrast_To_Divide_WACV_2022_paper.html)
Supplement: Supplementary file 1 [file Zheltonozhskii_Contrast_To_Divide_WACV_2022_supplemental.pdf]

# Supplementary material for Contrast to Divide: Self-Supervised Pre-Training for Learning with Noisy Labels

Evgenii Zheltonozhskii<sup>\*1</sup>, Chaim Baskin<sup>\*1</sup>, Avi Mendelson<sup>1</sup>, Alex M. Bronstein<sup>1</sup>, Or Litany<sup>2</sup>

<sup>1</sup>Technion - Israel Institute of Technology, <sup>2</sup>NVIDIA

[evgeniizh@campus.technion.ac.il](mailto:evgeniizh@campus.technion.ac.il); [chaimbaskin@campus.technion.ac.il](mailto:chaimbaskin@campus.technion.ac.il);

[mendlson@technion.ac.il](mailto:mendlson@technion.ac.il); [bron@cs.technion.ac.il](mailto:bron@cs.technion.ac.il);

[orlitany@gmail.com](mailto:orlitany@gmail.com)

## A. Implementation details

### A.1. Clothing1M

As most previous works, we used ResNet-50 architecture, but did not utilize ImageNet pre-training. For self-supervised pre-training, we used a SimCLR implementation<sup>1</sup> in PyTorch [2], trained on 8 NVIDIA 2080 Ti GPUs for 750 epochs. We trained the network using the AdamW optimizer [1].

**DivideMix** For DivideMix, we used a weight decay of 0.001, and a batch size of 32. As in the case of CIFAR, the warm-up period is five epochs. We trained the network for 120 epochs, with initial learning rate of 0.002, reduced by a factor of 10 after 40 epochs. For each epoch, we sampled 1000 mini-batches from the training data with same amount of samples of every class (according to noisy label). We set  $\lambda_{\mathcal{U}} = 0$ . Since a large amount of data is available, we found that increasing value of the threshold to  $\tau = 0.7$  improves the performance of the network.

**ELR+** For ELR+, we used the default hyperparameters, except for reduced learning rate (0.001).

### A.2. WebVision

**DivideMix** For WebVision, we also used ResNet-50 architecture. For self-supervised pre-training, we used a SimCLR implementation<sup>2</sup> in PyTorch [2], trained on 8 NVIDIA 2080 Ti GPUs for 1000 epochs. We trained the network using the AdamW optimizer [1] with a weight decay of 0.001, and a batch size of 32. The warm-up period is one epoch. We trained the network for 80 epochs, with initial learning rate of 0.002, reduced by a factor of 10 after 40 epochs. We set  $\lambda_{\mathcal{U}} = 0$ .

## B. Noise detection analysis

To evaluate the quality of noise detection, in Fig. B.1 we present the ROC-AUC score of noise detection and the effective noise rate, defined as the share of noisy samples in the labeled part of the dataset. C2D demonstrates multiple desired properties including a higher initial score, a much faster rise in separability score as well as a more stable decrease in effective noise level, and eventually a higher overall score and lower noise level. Moreover, even though C2D and the baseline both suffer from decrease in the ROC-AUC score due to overfitting, C2D demonstrated a lower gap between the peak and final scores than the baseline.

## References

1. Ilya Loshchilov and Frank Hutter. Decoupled weight decay regularization. *arXiv preprint arXiv:1711.05101*, 2017. (cited on p. 1)
2. Adam Paszke, Sam Gross, Francisco Massa, Adam Lerer, James Bradbury, Gregory Chanan, Trevor Killeen, Zeming Lin, Natalia Gimelshein, Luca Antiga, Alban Desmaison, Andreas Kopf, Edward Yang, Zachary DeVito, Martin Raison, Alykhan Tejani, Sasank Chilamkurthy, Benoit Steiner, Lu Fang, Junjie Bai, and Soumith Chintala. PyTorch: an imperative style, high-performance deep learning library. In H. Wallach, H. Larochelle, A. Beygelzimer, F. d'Alché-Buc, E. Fox, and R. Garnett, editors, *Advances in Neural Information Processing Systems 32*, pages 8026–8037. Curran Associates, Inc., 2019. (cited on p. 1)

<sup>\*</sup>Equal contribution.

<sup>1</sup><https://github.com/HobbitLong/SupContrast>

<sup>2</sup><https://github.com/HobbitLong/SupContrast>

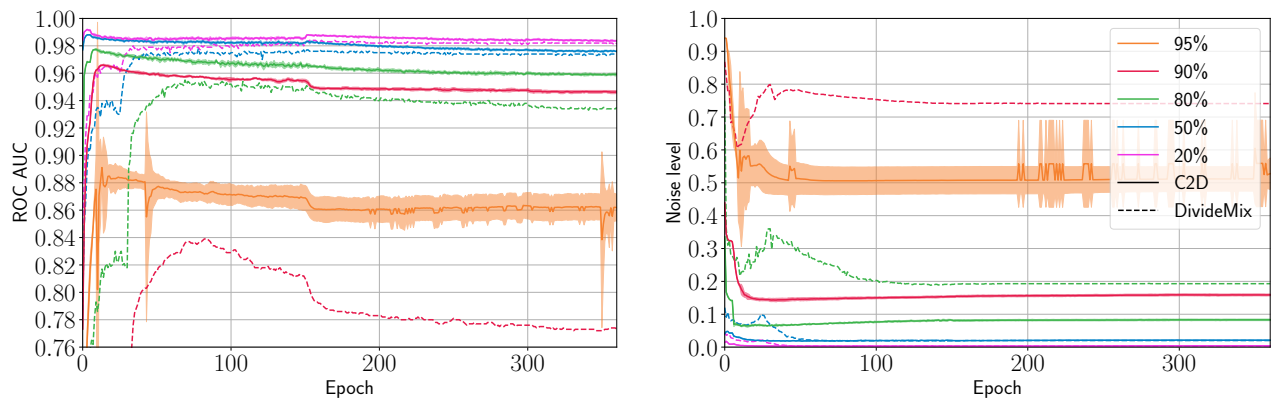

Figure B.1: Training time ROC-AUC scores (left) and effective noise rates (right). C2D demonstrates higher initial score, faster rise, and more stable decrease in effective noise level.
